# Supplementary material for: Blending Technology Based on HPLC Fingerprint and Nonlinear Programming to Control the Quality of Ginkgo Leaves
Source: MDPI journal article supplement (doi:10.3390/molecules27154733), 2022-07-25
Supplement: s1 [file s1]

Support Table S1 Standard compounds information

| Chemical name                                                  | Manufacturer                                        | Purity |
|----------------------------------------------------------------|-----------------------------------------------------|--------|
| Ginkgolide J                                                   | Laboratory production                               | /      |
| Ginkgolide A                                                   | Laboratory production                               | /      |
| Ginkgolide B                                                   | Laboratory production                               | /      |
| Ginkgolide C                                                   | Laboratory production                               | /      |
| Quercetin-3-O-(2,6-di-O-rhamnosyl-galactoside)                 | Laboratory production                               | /      |
| Myricetin-3-O-rutinoside                                       | Laboratory production                               | /      |
| Clitorin                                                       | CHENGDU MUST BIO-TECHNOLOGY CO., LTD                | 0.9999 |
| Rutin                                                          | China National Institutes for Food and Drug Control | 0.917  |
| Queretagetin-3-O-rutinoside                                    | Laboratory production                               | /      |
| quercetin 3-O-beta-D-glucopyranosyl-(1->2)-rhamnopyranoside    | CHENGDU MUST BIO-TECHNOLOGY CO., LTD                | 0.9995 |
| Nicotiflorin                                                   | China National Institutes for Food and Drug Control | 0.908  |
| Narcissoside                                                   | China National Institutes for Food and Drug Control | 0.931  |
| Quercetin-3-O-(6'''-trans-p-coumaroyl-2''-glucosyl)rhamnoside  | CHENGDU MUST BIO-TECHNOLOGY CO., LTD                | 0.98   |
| Kaempferol-3-O-glucosyl(1-2)rhamnoside                         | Laboratory production                               | /      |
| Kaempferol-3-O-(6'''-trans-p-coumaroyl-2''-glucosyl)rhamnoside | CHENGDU MUST BIO-TECHNOLOGY CO.,LTD                 | 0.995  |

Support Table S2 Sample Information

| Sample number | Sample Description | Growth year |
|---------------|--------------------|-------------|
| S1            | Shandong           | <5          |
| S2            | Shandong           | <5          |
| S3            | Shanxi             | <5          |
| S4            | Shanxi             | <5          |
| S5            | Pizhou             | 2           |
| S6            | Pizhou             | 2           |
| S7            | Pizhou             | 3           |
| S8            | Pizhou             | 3           |
| S9            | Pizhou             | 4           |
| S10           | Pizhou             | 4           |
| S11           | Pizhou             | 5           |

|     |               |         |
|-----|---------------|---------|
| S12 | Pizhou        | 5       |
| S13 | Pizhou        | 10      |
| S14 | Pizhou        | 10      |
| S15 | Pizhou        | over 10 |
| S16 | Pizhou        | over10  |
| S17 | Pizhou        | over 10 |
| T1  | manufacturers | 5       |
| T2  | manufacturers | 5       |
| T3  | manufacturers | 5       |
| T4  | manufacturers | 5       |
| T5  | manufacturers | 5       |
| T6  | manufacturers | 5       |
| T7  | manufacturers | 5       |
| T8  | manufacturers | 5       |
| M1  | market        | 5       |
| M2  | market        | 5       |
| M3  | market        | 5       |
| M4  | market        | 5       |
| M5  | market        | 5       |
| M6  | market        | 5       |
| M7  | market        | 5       |
| M8  | market        | 5       |
| M9  | market        | 5       |

Support Table S3 The similarity and RDC between samples of different origins and growth years

|     | P1    | P2    | P3    | P4    | P5    | P6    | P7    | P8    | P9   | P10   | P11   | P12   | P13   | P14   | P15   | Similarity |
|-----|-------|-------|-------|-------|-------|-------|-------|-------|------|-------|-------|-------|-------|-------|-------|------------|
| S1  | 134.0 | 157.0 | 102.0 | 99.0  | 127.0 | 46.0  | 123.0 | 141.0 | 60.0 | 126.0 | 90.0  | 62.0  | 92.0  | 115.0 | 66.0  | 96.0       |
| S2  | 120.0 | 160.0 | 90.0  | 110.0 | 121.0 | 62.0  | 126.0 | 140.0 | 62.0 | 124.0 | 87.0  | 75.0  | 90.0  | 111.0 | 65.0  | 96.0       |
| S3  | 122.0 | 143.0 | 151.0 | 300.0 | 86.0  | 114.0 | 92.0  | 182.0 | 27.0 | 137.0 | 125.0 | 71.0  | 112.0 | 156.0 | 97.0  | 96.0       |
| S4  | 147.0 | 145.0 | 144.0 | 265.0 | 103.0 | 112.0 | 95.0  | 157.0 | 47.0 | 123.0 | 103.0 | 63.0  | 101.0 | 141.0 | 85.0  | 97.0       |
| S5  | 86.0  | 115.0 | 99.0  | 111.0 | 87.0  | 92.0  | 109.0 | 125.0 | 57.0 | 103.0 | 100.0 | 128.0 | 147.0 | 119.0 | 138.0 | 98.0       |
| S6  | 90.0  | 123.0 | 137.0 | 107.0 | 91.0  | 106.0 | 113.0 | 126.0 | 75.0 | 115.0 | 93.0  | 125.0 | 155.0 | 125.0 | 137.0 | 98.0       |
| S7  | 78.0  | 89.0  | 157.0 | 80.0  | 94.0  | 128.0 | 114.0 | 91.0  | 48.0 | 110.0 | 63.0  | 78.0  | 175.0 | 127.0 | 155.0 | 96.0       |
| S8  | 76.0  | 83.0  | 119.0 | 58.0  | 87.0  | 120.0 | 103.0 | 89.0  | 47.0 | 101.0 | 63.0  | 83.0  | 163.0 | 115.0 | 141.0 | 96.0       |
| S9  | 75.0  | 92.0  | 63.0  | 61.0  | 97.0  | 122.0 | 97.0  | 80.0  | 38.0 | 40.0  | 73.0  | 64.0  | 85.0  | 76.0  | 100.0 | 99.0       |
| S10 | 106.0 | 107.0 | 34.0  | 106.0 | 105.0 | 6.0   | 107.0 | 88.0  | 65.0 | 69.0  | 83.0  | 79.0  | 95.0  | 86.0  | 103.0 | 98.0       |
| S11 | 173.0 | 129.0 | 84.0  | 29.0  | 138.0 | 64.0  | 121.0 | 42.0  | 29.0 | 89.0  | 28.0  | 18.0  | 100.0 | 159.0 | 127.0 | 95.0       |

|     |       |       |       |       |       |       |       |      |       |       |       |       |       |       |       |      |
|-----|-------|-------|-------|-------|-------|-------|-------|------|-------|-------|-------|-------|-------|-------|-------|------|
| S12 | 187.0 | 138.0 | 101.0 | 12.0  | 143.0 | 123.0 | 134.0 | 46.0 | 29.0  | 82.0  | 56.0  | 50.0  | 114.0 | 158.0 | 140.0 | 96.0 |
| S13 | 92.0  | 95.0  | 82.0  | 79.0  | 142.0 | 114.0 | 108.0 | 81.0 | 39.0  | 55.0  | 134.0 | 170.0 | 71.0  | 79.0  | 90.0  | 96.0 |
| S14 | 80.0  | 67.0  | 63.0  | 58.0  | 113.0 | 139.0 | 85.0  | 76.0 | 53.0  | 39.0  | 106.0 | 102.0 | 51.0  | 62.0  | 67.0  | 95.0 |
| S15 | 33.0  | 24.0  | 89.0  | 65.0  | 22.0  | 154.0 | 27.0  | 81.0 | 220.0 | 22.0  | 157.0 | 168.0 | 48.0  | 29.0  | 62.0  | 83.0 |
| S16 | 71.0  | 15.0  | 95.0  | 126.0 | 119.0 | 31.0  | 141.0 | 83.0 | 771.0 | 344.0 | 183.0 | 184.0 | 49.0  | 13.0  | 66.0  | 69.0 |
| S17 | 31.0  | 18.0  | 90.0  | 35.0  | 25.0  | 167.0 | 5.0   | 73.0 | 33.0  | 22.0  | 155.0 | 180.0 | 50.0  | 31.0  | 62.0  | 84.0 |

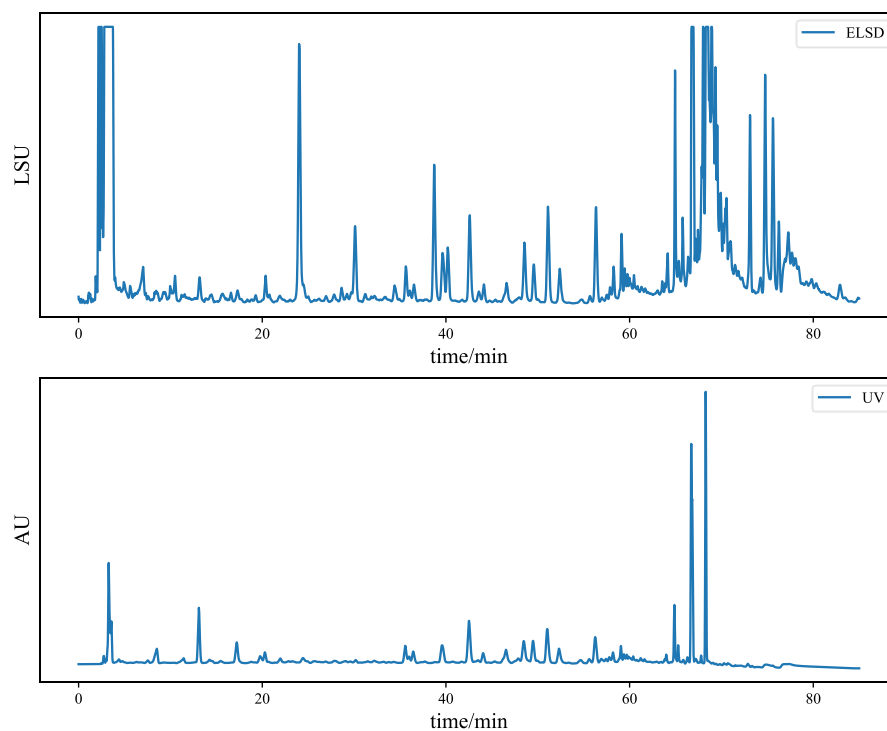

Support Figure S1 Ginkgo biloba HPLC-UV-ELSD chromatograms

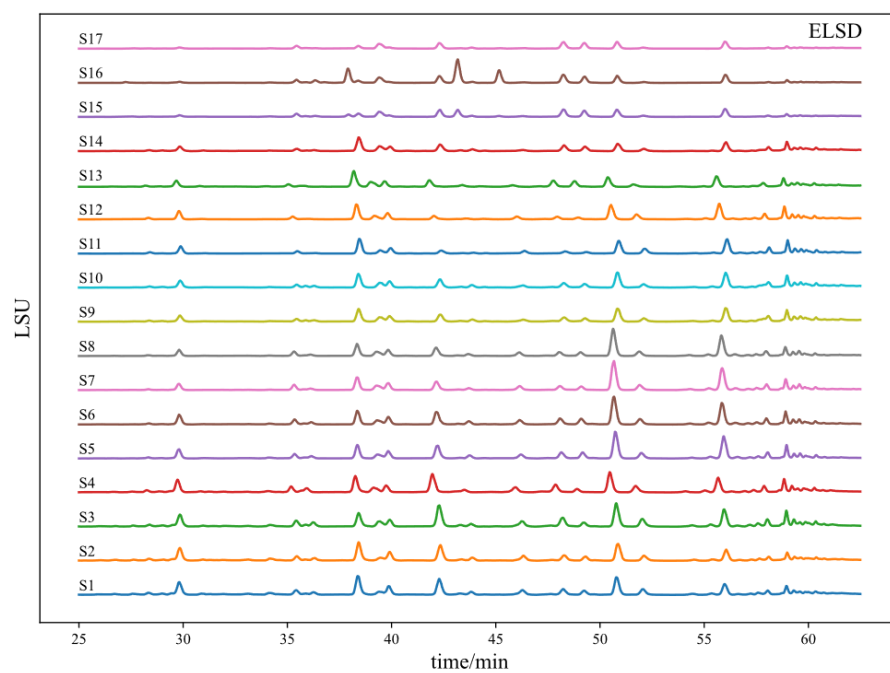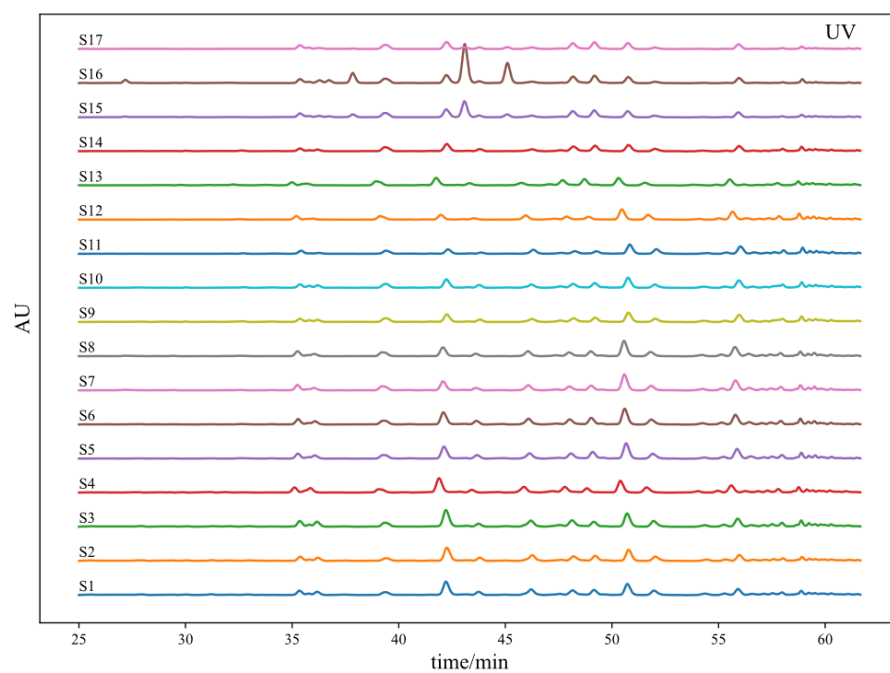

Support Figure S2 Ginkgo biloba HPLC-UV-ELSD chromatograms between samples of different origins and growth years

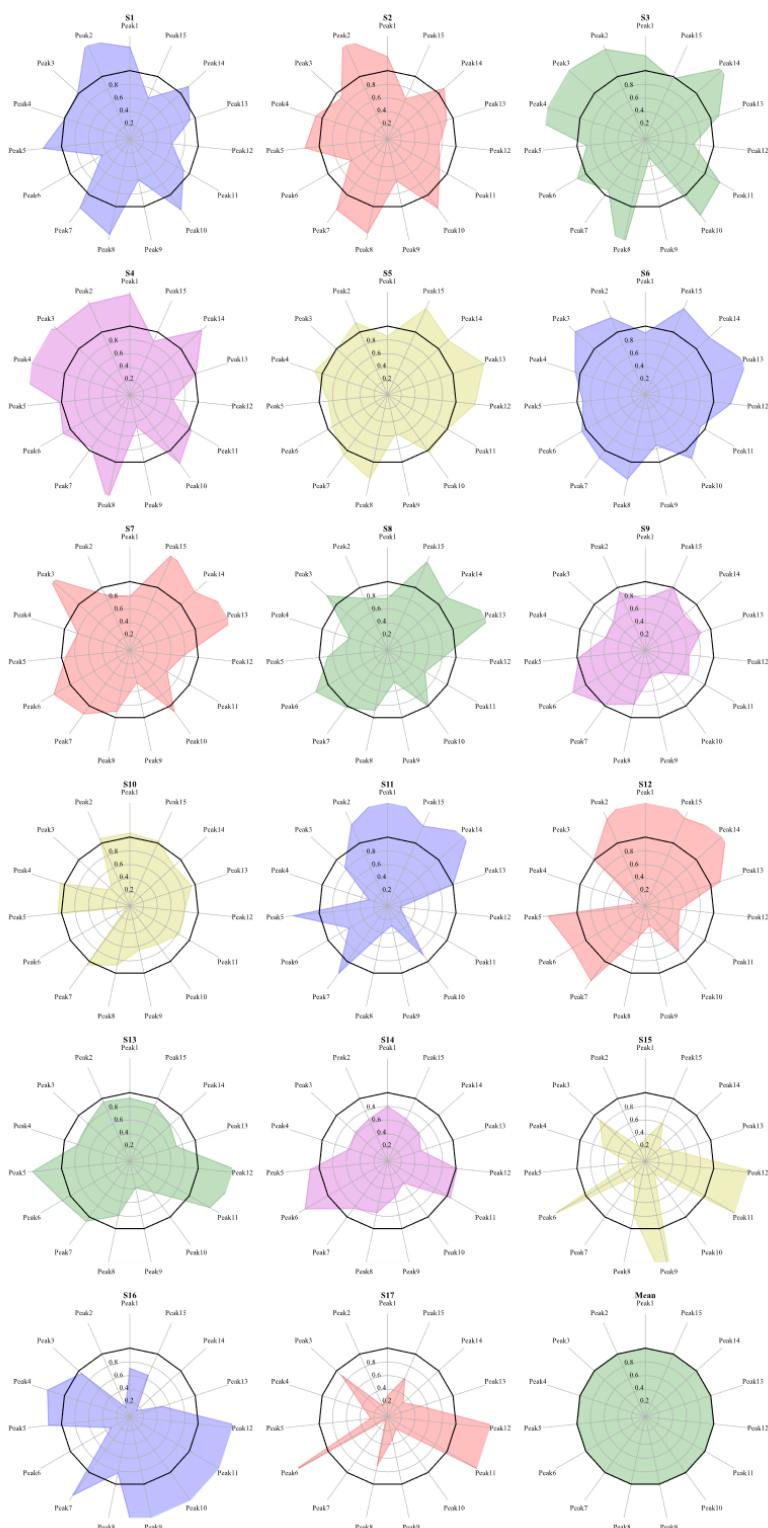

Support Figure S3 Radar diagram of *Ginkgo biloba* of samples of different origins and growth years

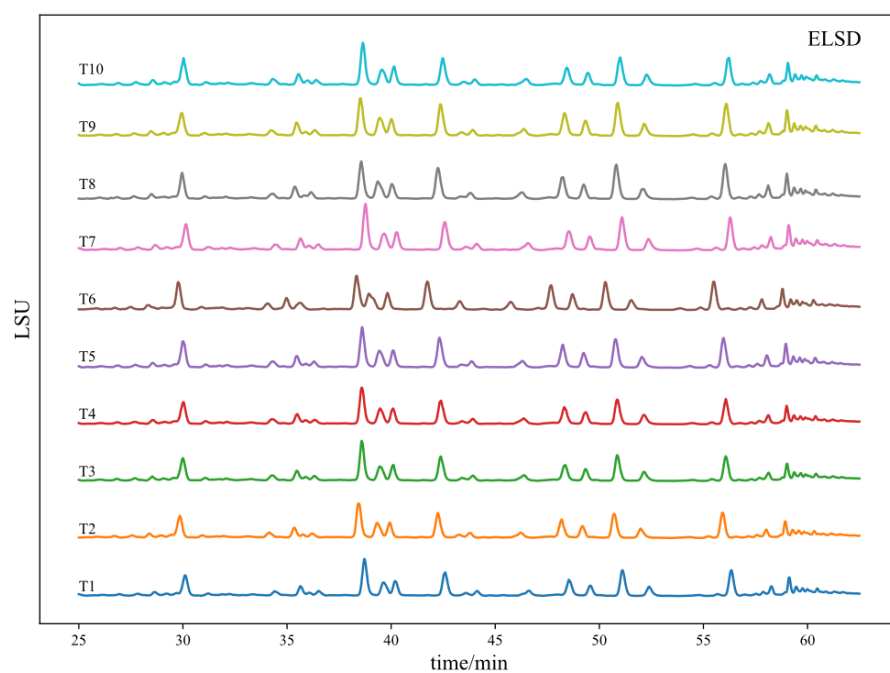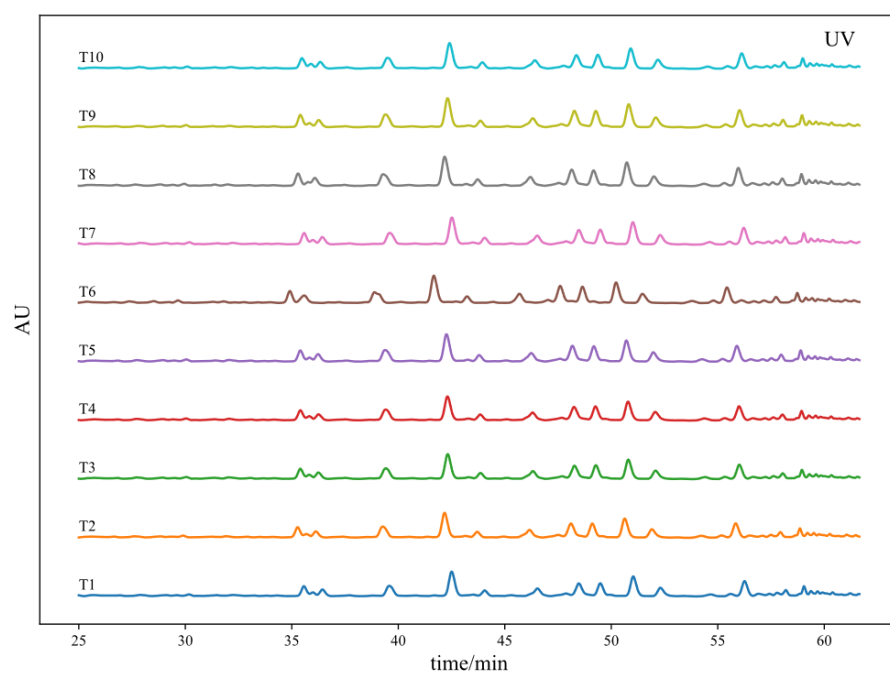

Support Figure S4 Ginkgo biloba HPLC-UV-ELSD chromatograms of samples used in the factory for actual production.

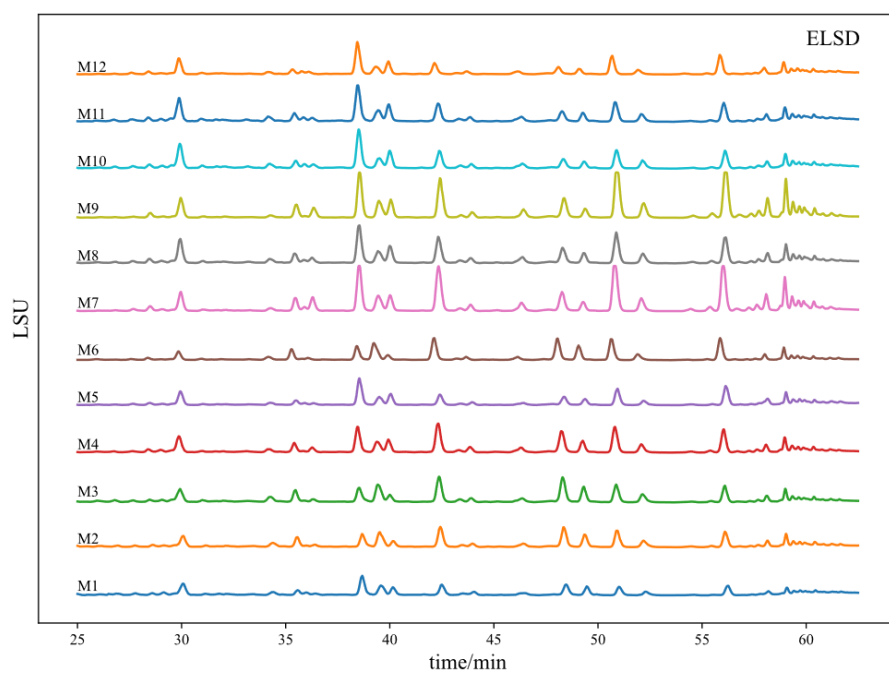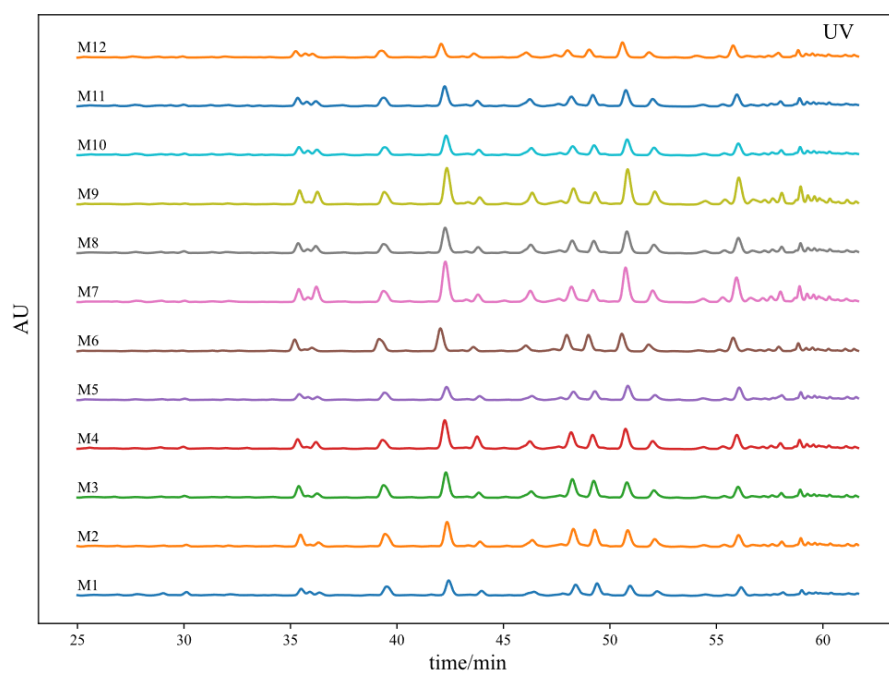

Support Figure S5 Ginkgo biloba HPLC-UV-ELSD chromatograms of qualified samples acquired in the market.
